# Supplementary material
Source: Springer Nature journal article supplement (https://www.springermedizin.de/resource/supplementary/13012_2011_466_MOESM5_ESM.pdf/9630032)

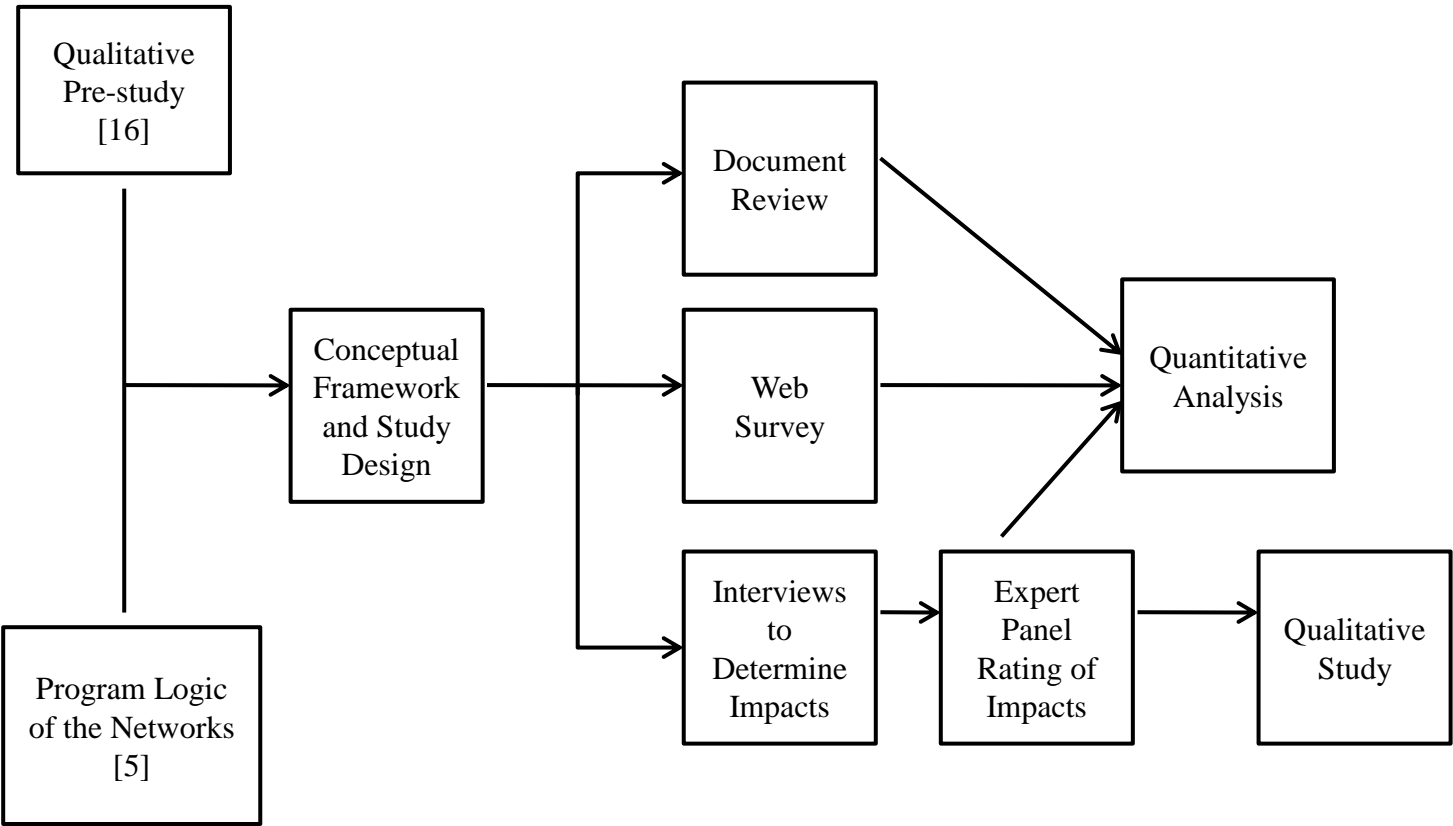

Supplement: MOESM5 [file 9630032]
